# Supplementary material
Source: PubMed Central journal article supplement (PMC4947820)
Supplement: cmi201547x1.pdf [file cmi201547x1.pdf]

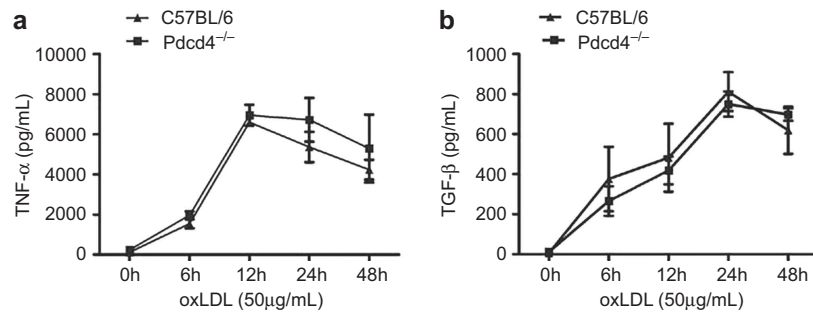

**Supplementary Figure 1** The concentration of TNF- $\alpha$  and TGF- $\beta$  in cultured supernatant of macrophages stimulated with oxLDL. Peritoneal macrophages of C57BL/6 and Pdc4<sup>-/-</sup> mice were collected, cultured in vitro and stimulated with oxLDL (50 $\mu$ g/mL) for the indicated time points. The concentration of TNF- $\alpha$  (**a**) and TGF- $\beta$  (**b**) in cultured supernatant in C57BL/6 and Pdc4<sup>-/-</sup> macrophages was detected by ELISA.

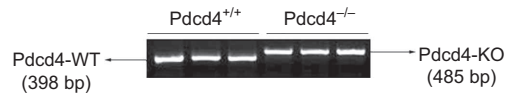

**Supplementary Figure 2** The genotype of Pdc4 deficiency mice. The genomic DNA as template was extracted from a small piece of tail from Pdc4<sup>+/+</sup>Apoe<sup>-/-</sup> and Pdc4<sup>-/-</sup>Apoe<sup>-/-</sup> mice aged 8 weeks old. The genotype of Pdc4 was identified by PCR using specific primers for Pdc4-WT and Pdc4-KO.

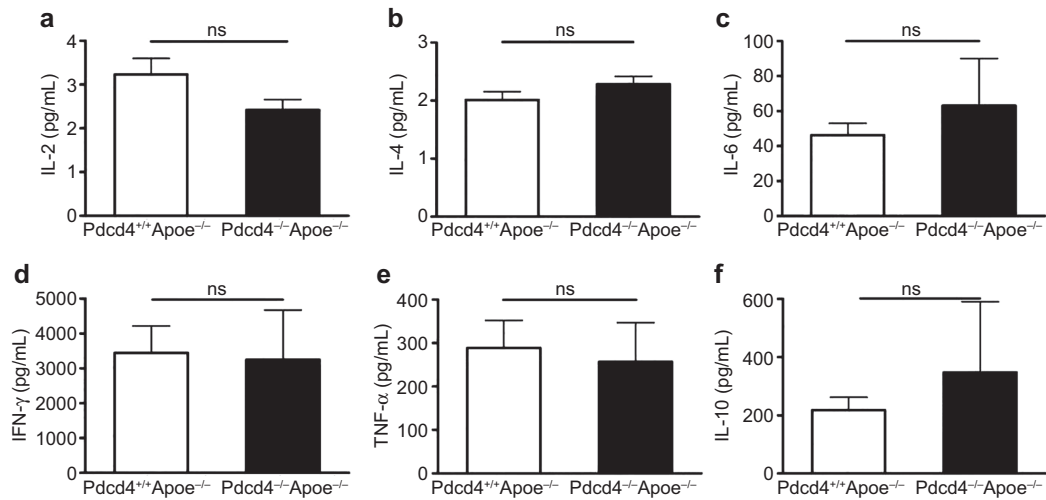

**Supplementary Figure 3** *Pdc4<sup>+/+</sup>Apoe<sup>-/-</sup>* and *Pdc4<sup>-/-</sup>Apoe<sup>-/-</sup>* mice were fed a high-fat diet from the age of 8 weeks to 16 weeks. Splenocytes were stimulated with anti-CD3 monoclonal antibody (5 $\mu$ g/mL) in vitro for 3 days. The concentrations of IL-2, IL-4, IL-6, IFN- $\gamma$ , TNF- $\alpha$ , IL-17 and IL-10 in cultured supernatant were detected by BD CBA Mouse Th1/Th2/Th17 Cytokine Kit. (a-f) The concentrations of IL-2 (a), IL-4 (b), IL-6 (c), IFN- $\gamma$  (d), TNF- $\alpha$  (e) and IL-10 (f) between two genotype mice were analyzed by unpaired *t* test.

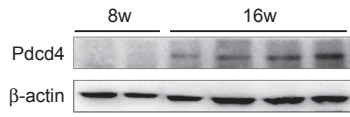

**Supplementary Figure 4** The expression of Pdc4 during the development of lesions in *Apoe*<sup>-/-</sup> mice. Protein was extracted from aortic arch and thoracic-abdominal aorta at 8 and 16 weeks old, respectively, and used for detection of the Pdc4 expression by western blot.

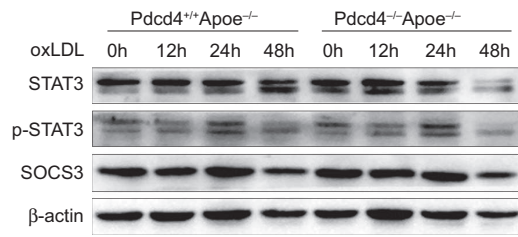

**Supplementary Figure 5** Peritoneal macrophages of Pdcc4<sup>+/+</sup>Apoe<sup>-/-</sup> and Pdcc4<sup>-/-</sup>Apoe<sup>-/-</sup> mice were collected, cultured in vitro and stimulated with oxLDL (50μg/mL) for 12h, 24h and 48h. The phosphorylated activation of STAT-3 and SOCS3 in macrophages were detected by Western blotting.

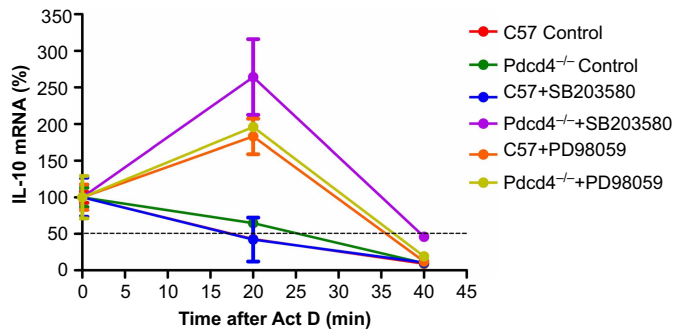

**Supplementary Figure 6 Detection of IL-10 mRNA stability.** WT and Pdc4<sup>-/-</sup> peritoneal macrophages were treated with actinomycin D (10  $\mu$ g/ml) for various times (0min, 20min, 40min) and IL-10 mRNA levels were analyzed by qPCR and normalized to 18S in absence or in presence of inhibitor of ERK (SB203580) and of P38 (PD98059) (20  $\mu$ M).
